# Supplementary material for: Potent antibody therapeutics by design
Source: Springer Nature journal article supplement (doi:10.1038/nri1837), 2006-04-07
Supplement: nri1837-s1.pdf [file nri1837-s1.pdf]

**S1 | Monoclonal antibodies approved for therapeutic use in the United States\***

| <b>Product name, antibody name and company<sup>‡</sup></b>                                     | <b>Antibody format</b> | <b>Antigen</b>                               | <b><math>K_d</math> (nM)</b> | <b>Proposed mechanisms of action</b>                                          | <b>Approved indications</b>                                   | <b>References</b> |
|------------------------------------------------------------------------------------------------|------------------------|----------------------------------------------|------------------------------|-------------------------------------------------------------------------------|---------------------------------------------------------------|-------------------|
| Orthoclone OKT3; muromonab-CD3 (Ortho Biotech Products, L.P.)                                  | Mouse IgG2a            | CD3                                          | 0.83                         | Blocking of function of T-cell-expressed CD3; reversal of graft rejection     | Prophylaxis of acute kidney-transplant rejection              | 1,2               |
| ReoPro; abciximab (Centocor, Inc.)                                                             | Chimeric Fab           | gpIIb–gpIIIa and $\alpha_v\beta_3$ -integrin | 5                            | Receptor binding and antagonism; inhibition of platelet aggregation           | Prevention of platelet-mediated clots in coronary angioplasty | 3–5               |
| Rituxan; rituximab (Genentech, Inc. and Biogen Idec Inc.) and MabThera (F.Hoffman-LaRoche Ltd) | Chimeric IgG1          | CD20                                         | 8.0                          | Sensitization of cells to chemotherapy; induction of apoptosis, ADCC and CDC  | Non-Hodgkin’s lymphoma and rheumatoid arthritis               | 6–8               |
| Zenapax; daclizumab (F.Hoffman-LaRoche Ltd)                                                    | Humanized IgG1         | CD25                                         | 0.3                          | Receptor binding and antagonism                                               | Prophylaxis of acute kidney-transplant rejection              | 9,10              |
| Simulect; basiliximab (Novartis AG)                                                            | Chimeric IgG1          | CD25                                         | 0.1                          | Receptor binding and antagonism                                               | Prophylaxis of acute kidney-transplant rejection              | 11,12             |
| Synagis; palivizumab (MedImmune Inc. and Abbott Laboratories)                                  | Humanized IgG1         | RSV gpF                                      | 0.96                         | Binding and neutralization of RSV; inhibition of viral fusion and replication | Prophylaxis against RSV infection in children at high risk    | 13–15             |

|                                                                          |                                          |                    |       |                                                                                                                           |                                                                                                    |       |
|--------------------------------------------------------------------------|------------------------------------------|--------------------|-------|---------------------------------------------------------------------------------------------------------------------------|----------------------------------------------------------------------------------------------------|-------|
| Remicade; infliximab (Johnson & Johnson and Schering Plough Corporation) | Chimeric IgG1                            | TNF                | 0.1   | Ligand binding and receptor antagonism                                                                                    | Crohn's disease, rheumatoid and psoriatic arthritis, ulcerative colitis and ankylosing spondylitis | 16,17 |
| Herceptin; trastuzumab (Genentech, Inc. and F.Hoffman-LaRoche Ltd)       | Humanized IgG1                           | ERBB2              | 5     | Sensitization of cells to chemotherapy; inhibition of angiogenesis and proliferation; induction of ADCC                   | Metastatic breast cancer that overexpresses ERBB2                                                  | 18–20 |
| Mylotarg; gemtuzumab ozogamicin (Wyeth)                                  | Humanized IgG4, calicheamicin conjugated | CD33               | 0.08  | Induction of double-stranded DNA breaks and cell death (caused by calicheamicin)                                          | Acute myeloid leukaemia that expresses CD33                                                        | 21,22 |
| Campath; alemtuzumab (Genzyme Corporation and Schering AG)               | Humanized IgG1                           | CD52               | 10–32 | Induction of ADCC and CDC                                                                                                 | B-cell chronic lymphocytic leukaemia                                                               | 23–25 |
| Zevalin; ibritumomab tiuxetan (Biogen Idec Inc.)                         | Mouse IgG1, <sup>90</sup> Y-labelled     | CD20               | 14–18 | Induction of cell death by radiation; induction of apoptosis                                                              | Non-Hodgkin's lymphoma                                                                             | 26,27 |
| Humira; adalimumab (Abbott Laboratories)                                 | Human IgG1                               | TNF                | 0.1   | Ligand binding and receptor antagonism; induction of CDC                                                                  | Rheumatoid and psoriatic arthritis                                                                 | 28,29 |
| Xolair; omalizumab (Genentech, Inc. and Novartis AG)                     | Humanized IgG1                           | IgE                | 0.17  | Ligand binding and receptor antagonism; reduction in release of allergic-response mediators from mast cells and basophils | Persistent asthma                                                                                  | 30–33 |
| Bexxar; <sup>131</sup> I-tositumomab (GlaxoSmithKline)                   | Mouse IgG2a, <sup>131</sup> I-labelled   | CD20               | 1.4   | Induction of cell death by radiation; induction of apoptosis, ADCC and CDC                                                | Non-Hodgkin's lymphoma                                                                             | 34–36 |
| Raptiva; efalizumab (Genentech, Inc. and Serono S.A.)                    | Humanized IgG1                           | CD11a <sup>§</sup> | 3     | Receptor binding and antagonism; inhibition of leukocyte adhesion to other cells                                          | Plaque psoriasis                                                                                   | 37–39 |

|                                                                                       |                |                                                                                    |     |                                                                                                                                                                                                                            |                                                        |       |
|---------------------------------------------------------------------------------------|----------------|------------------------------------------------------------------------------------|-----|----------------------------------------------------------------------------------------------------------------------------------------------------------------------------------------------------------------------------|--------------------------------------------------------|-------|
| Erbitux; cetuximab<br>(ImClone Systems Inc.<br>and Bristol-Myers<br>Squibb Company)   | Chimeric IgG1  | EGFR                                                                               | 0.2 | Receptor binding and antagonism; inhibition of cell proliferation; induction of apoptosis; sensitization of cells to chemotherapy and radiotherapy; inhibition of angiogenesis, invasion and metastasis; induction of ADCC | Metastatic colorectal cancer, and head and neck cancer | 40,41 |
| Avastin; bevacizumab<br>(Genentech, Inc. and<br>F.Hoffman-LaRoche Ltd)                | Humanized IgG1 | VEGF                                                                               | 1.1 | Ligand binding and receptor antagonism; inhibition of angiogenesis and metastatic-disease progression                                                                                                                      | Metastatic colorectal cancer                           | 42,43 |
| Tysabri; natalizumab<br>(Biogen Idec Inc. and<br>Elan Corporation, plc) <sup>  </sup> | Humanized IgG4 | $\alpha_4$ -Subunit of $\alpha_4\beta_1$ -integrin and $\alpha_4\beta_7$ -integrin | 0.3 | Receptor binding and antagonism; inhibition of leukocyte adhesion to their counter receptors                                                                                                                               | Multiple sclerosis                                     | 44    |

\*Sources include drug prescribing information, company web sites and REF. 45. See Supplementary information S1 (table) for references. <sup>‡</sup>Products are listed in order of first regulatory approval from Orthoclone OKT3 (1986) to Tysabri (2004). <sup>§</sup>Also known as  $\alpha_L$ -integrin. <sup>||</sup>Natalizumab (Tysabri) was voluntarily withdrawn from the market by its manufacturers because of safety concerns in early 2005<sup>44</sup>. Five of 5,000 patients treated with natalizumab developed progressive multifocal leukoencephalopathy, including two who died<sup>46</sup>. The US Food and Drug Administration has recently lifted the clinical-trial hold on natalizumab, and Biogen Idec Inc. and Elan Corporation, plc, plan further safety testing of natalizumab in patients with multiple sclerosis. ADCC, antibody-dependent cell-mediated cytotoxicity; CDC, complement-dependent cytotoxicity; EGFR, epidermal-growth-factor receptor; gp, glycoprotein;  $K_d$ , antigen-binding affinity; RSV, respiratory syncytial virus; TNF, tumour-necrosis factor; VEGF, vascular endothelial growth factor.

## References

1. Kung, P., Goldstein, G., Reinherz, E. L. & Schlossman, S. F. Monoclonal antibodies defining distinctive human T cell surface antigens. *Science* **206**, 347–349 (1979).
2. Smith, S. L. Ten years of orthoclone OKT3 (muromonab-CD3): a review. *J. Transplant. Coord.* **6**, 109–121 (1996).
3. Knight, D. M. *et al.* Pharmacodynamic enhancement of the anti-platelet antibody fab abciximab by site-specific pegylation. *Platelets* **15**, 409–418 (2004).
4. Ibbotson, T., McGavin, J. K. & Goa, K. L. Abciximab: an updated review of its therapeutic use in patients with ischaemic heart disease undergoing percutaneous coronary revascularisation. *Drugs* **63**, 1121–1163 (2003).
5. Kandzari, D. E. *et al.* Improved clinical outcomes with abciximab therapy in acute myocardial infarction: a systematic overview of randomized clinical trials. *Am. Heart J.* **147**, 457–462 (2004).
6. Reff, M. E. *et al.* Depletion of B cells *in vivo* by a chimeric mouse human monoclonal antibody to CD20. *Blood* **83**, 435–445 (1994).

7. Grillo-Lopez, A. J. Rituximab (Rituxan/MabThera): the first decade (1993-2003). *Expert Rev. Anticancer Ther.* **3**, 767–779 (2003).
8. Cartron, G., Watier, H., Golay, J. & Solal-Celigny, P. From the bench to the bedside: ways to improve rituximab efficacy. *Blood* **104**, 2635–2642 (2004).
9. Carswell, C. I., Plosker, G. L. & Wagstaff, A. J. Daclizumab: a review of its use in the management of organ transplantation. *BioDrugs* **15**, 745–773 (2001).
10. Wiland, A. M. & Philosophe, B. Daclizumab induction in solid organ transplantation. *Expert Opin. Biol. Ther.* **4**, 729–740 (2004).
11. Kapic, E., Becic, F. & Kusturica, J. Basiliximab, mechanism of action and pharmacological properties. *Med. Arh.* **58**, 373–376 (2004).
12. Chapman, T. M. & Keating, G. M. Basiliximab: a review of its use as induction therapy in renal transplantation. *Drugs* **63**, 2803–2835 (2003).
13. Wu, H. *et al.* Ultra-potent antibodies against respiratory syncytial virus: effects of binding kinetics and binding valence on viral neutralization. *J. Mol. Biol.* **350**, 126–144 (2005).
14. Fenton, C., Scott, L. J. & Plosker, G. L. Palivizumab: a review of its use as prophylaxis for serious respiratory syncytial virus infection. *Paediatr. Drugs* **6**, 177–197 (2004).
15. Romero, J. R. Palivizumab prophylaxis of respiratory syncytial virus disease from 1998 to 2002: results from four years of palivizumab usage. *Pediatr. Infect. Dis. J.* **22**, S46–S54 (2003).
16. Nahar, I. K., Shojania, K., Marra, C. A., Alamgir, A. H. & Anis, A. H. Infliximab treatment of rheumatoid arthritis and Crohn's disease. *Ann. Pharmacother.* **37**, 1256–1265 (2003).
17. Winterfield, L. S. & Menter, A. Infliximab. *Dermatol. Ther.* **17**, 409–426 (2004).
18. Carter, P. *et al.* Humanization of an anti-p185HER2 antibody for human cancer therapy. *Proc. Natl Acad. Sci. USA* **89**, 4285–4289 (1992).
19. Emens, L. A. Trastuzumab: targeted therapy for the management of HER-2/neu-overexpressing metastatic breast cancer. *Am. J. Ther.* **12**, 243–253 (2005).
20. Finn, R. S. & Slamon, D. J. Monoclonal antibody therapy for breast cancer: herceptin. *Cancer Chemother. Biol. Response Modif.* **21**, 223–233 (2003).
21. Giles, F., Estey, E. & O'Brien, S. Gemtuzumab ozogamicin in the treatment of acute myeloid leukemia. *Cancer* **98**, 2095–2104 (2003).
22. Sievers, E. L. Antibody-targeted chemotherapy of acute myeloid leukemia using gemtuzumab ozogamicin (Mylotarg). *Blood Cells Mol. Dis.* **31**, 7–10 (2003).
23. Riechmann, L., Clark, M., Waldmann, H. & Winter, G. Reshaping human antibodies for therapy. *Nature* **332**, 323–327 (1988).
24. Hale, G. The CD52 antigen and development of the CAMPATH antibodies. *Cytotherapy* **3**, 137–143 (2001).
25. Robak, T. Alemtuzumab in the treatment of chronic lymphocytic leukemia. *BioDrugs* **19**, 9–22 (2005).
26. White, C. A. Radioimmunotherapy in non-Hodgkin's lymphoma: focus on <sup>90</sup>Y-ibritumomab tiuxetan (Zevalin). *J. Exp. Ther. Oncol.* **4**, 305–316 (2004).

27. Witzig, T. E. Yttrium-90-ibritumomab tiuxetan radioimmunotherapy: a new treatment approach for B-cell non-Hodgkin's lymphoma. *Drugs Today (Barc)* **40**, 111–119 (2004).
28. Patel, T. & Gordon, K. B. Adalimumab: efficacy and safety in psoriasis and rheumatoid arthritis. *Dermatol. Ther.* **17**, 427–431 (2004).
29. Scheinfeld, N. Adalimumab (Humira): a brief review for dermatologists. *J. Dermatolog. Treat.* **15**, 348–352 (2004).
30. Shields, R. L. *et al.* Anti-IgE monoclonal antibodies that inhibit allergen-specific histamine release. *Int. Arch. Allergy Immunol.* **107**, 412–413 (1995).
31. Presta, L. G. *et al.* Humanization of an antibody directed against IgE. *J. Immunol.* **151**, 2623–2632 (1993).
32. Casale, T. B. Omalizumab: an effective anti-IgE treatment for allergic asthma and rhinitis. *Drugs Today (Barc)* **40**, 367–376 (2004).
33. Holgate, S. T., Djukanovic, R., Casale, T. & Bousquet, J. Anti-immunoglobulin E treatment with omalizumab in allergic diseases: an update on anti-inflammatory activity and clinical efficacy. *Clin. Exp. Allergy* **35**, 408–416 (2005).
34. Cardarelli, P. M. *et al.* Binding to CD20 by anti-B1 antibody or F(ab')<sub>2</sub> is sufficient for induction of apoptosis in B-cell lines. *Cancer Immunol. Immunother.* **51**, 15–24 (2002).
35. Davies, A. J. Tositumomab and iodine [<sup>131</sup>I] tositumomab in the management of follicular lymphoma. An oncologist's view. *Q. J. Nucl. Med. Mol. Imaging* **48**, 305–316 (2004).
36. Wahl, R. L. Tositumomab and (131)I therapy in non-Hodgkin's lymphoma. *J. Nucl. Med.* **46** Suppl 1, 128S–140S (2005).
37. Werther, W. A. *et al.* Humanization of an anti-lymphocyte function-associated antigen (LFA)-1 monoclonal antibody and reengineering of the humanized antibody for binding to rhesus LFA-1. *J. Immunol.* **157**, 4986–4995 (1996).
38. Leonardi, C. L. Current concepts and review of efalizumab in the treatment of psoriasis. *Dermatol. Clin.* **22**, 427–435, ix (2004).
39. Jordan, J. K. Efalizumab for the Treatment of Moderate to Severe Plaque Psoriasis (CE) (September). *Ann. Pharmacother.* (2005).
40. Mendelson, J. Blockade of receptors for growth factors: an anticancer therapy—the fourth annual Joseph H Burchenal American Association of Cancer Research Clinical Research Award Lecture. *Clin. Cancer Res.* **6**, 747–753 (2000).
41. Goldberg, R. M. Cetuximab. *Nature Rev. Drug Discov. Suppl.*, S10–S11 (2005).
42. Presta, L. G. *et al.* Humanization of an anti-vascular endothelial growth factor monoclonal antibody for the therapy of solid tumors and other disorders. *Cancer Res.* **57**, 4593–4599 (1997).
43. Ferrara, N., Hillan, K. J., Gerber, H. P. & Novotny, W. Discovery and development of bevacizumab, an anti-VEGF antibody for treating cancer. *Nature Rev. Drug Disco.* **3**, 391–400 (2004).
44. Steinman, L. Case history: Blocking adhesion molecules as therapy for multiple sclerosis: natalizumab. *Nature Rev. Drug Discov.* **4**, 510–518 (2005).
45. Reichert, J. M., Rosensweig, C. J., Faden, L. B. & Dewitz, M. C. Monoclonal antibody successes in the clinic. *Nature Biotechnol.* **23**, 1073–1078 (2005).
46. Scott, C. T. The problem with potency. *Nature Biotechnol.* **23**, 1037–1039 (2005).
